# Supplementary material for: A sensitive method for the determination of total microcystins in water and sediment samples by liquid chromatography with fluorescence detection
Source: Royal Society of Chemistry journal article supplement (doi:10.1039/c4ay02457e), 2014-11-24
Supplement: c4ay02457e1.pdf [file c4ay02457e1.pdf]

# A sensitive method for the total microcystins determination in water and sediment samples by liquid chromatography with fluorescence detection

C. Wang,<sup>ab</sup> C. Tian,<sup>ab</sup> Y. Tian,<sup>ab</sup> B. Feng,<sup>ab</sup> S. We,<sup>c</sup> Y. Li,<sup>c</sup> X. Wu,<sup>\*a</sup> B. Xiao,<sup>\*a</sup>

<sup>a</sup>Key Laboratory of Algal Biology of Chinese Academy of Sciences, Institute of Hydrobiology, Chinese Academy of Sciences, Wuhan 430072, China.

<sup>b</sup>University of the Chinese Academy of Sciences, Beijing 10085, China.

<sup>c</sup>Key Laboratory for Applied Toxicology, Hubei Provincial Center for Disease Control and Prevention, Wuhan 430079, China

† Electronic supplementary information (ESI) available.

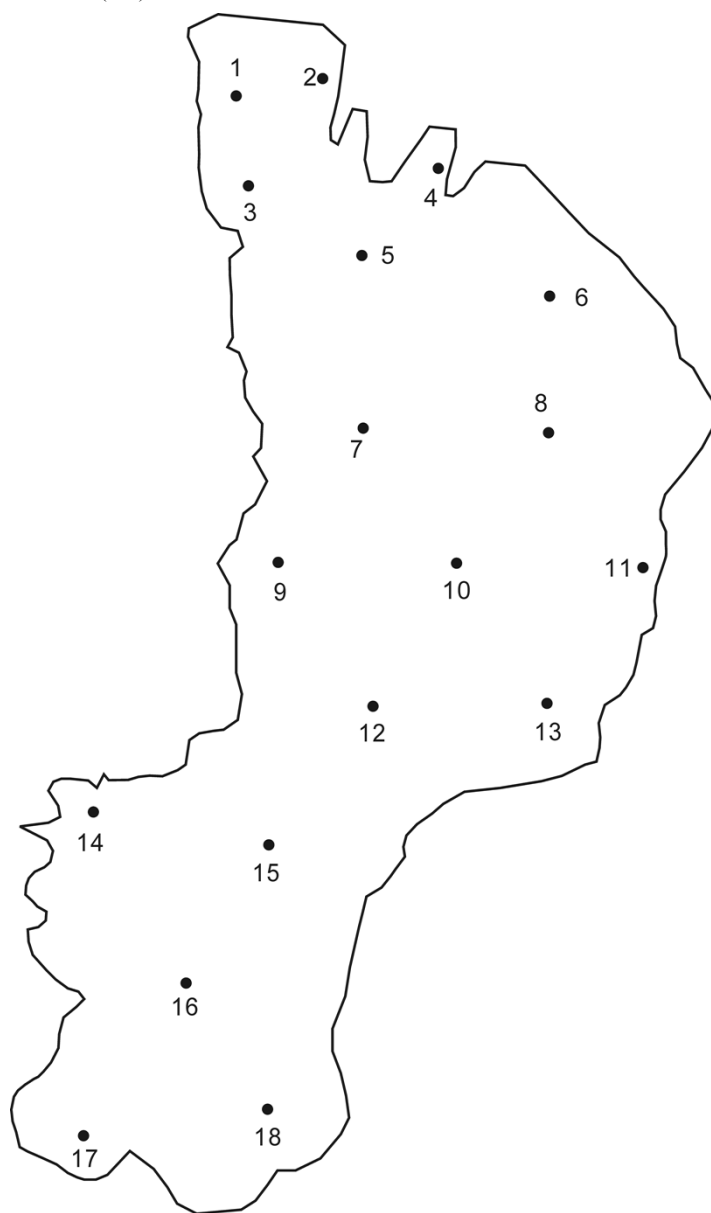

**Fig. S1** Sampling locations in Lake Dianchi.

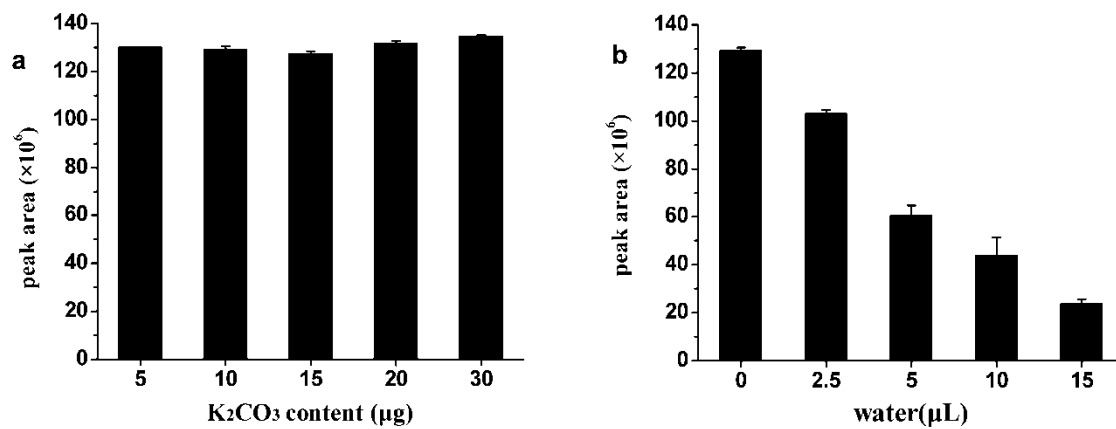

**Fig. S2.** Effect of K<sub>2</sub>CO<sub>3</sub> (a) and water content (b) on the derivatization of MMPB.
